# Supplementary material for: Azithromycin induces anti-viral effects in cultured bronchial epithelial cells from COPD patients
Source: PubMed Central journal article supplement (PMC4923851; doi:10.1038/srep28698), 2016-06-28

# **Azithromycin induces anti-viral effects in cultured bronchial epithelial cells from COPD patients**

Mandy Menzel<sup>1</sup>, Hamid Akbarshahi<sup>1</sup>, Leif Bjermer<sup>2</sup>, Lena Uller<sup>1\*</sup>

Affiliation:

<sup>1</sup> Respiratory Immunopharmacology, Department of Experimental Medical Science, Lund University, Sweden.

<sup>2</sup> Lung medicine and Allergology, Department of Clinical Sciences, Lund University, Sweden.

\* Corresponding author:

Lena Uller, Department of Experimental Medical Science, Lund University, BMC D12, 22184 Lund, Sweden. E-mail: [Lena.Uller@med.lu.se](mailto:Lena.Uller@med.lu.se).

**Supplementary figure S1: Azithromycin (AZM) does not display cytotoxic effects in primary bronchial epithelial cells from COPD patients.** HBECs from COPD patients were pre-treated with azithromycin for 24h before infection with 1MOI RV16 and continuous throughout the experiment. Alternatively, HBECs from COPD patients were pre-treated with azithromycin for 24h and continuous throughout the experiment. Cell supernatants were analysed for LDH levels. Comparison of different groups was performed by Kruskal-Wallis with Wilcoxon post testing. #:  $p < 0.05$ , ##:  $p < 0.01$  RV16 vs. control; \*:  $p < 0.05$  AZM vs. RV16. Data was obtained from 4 donors.

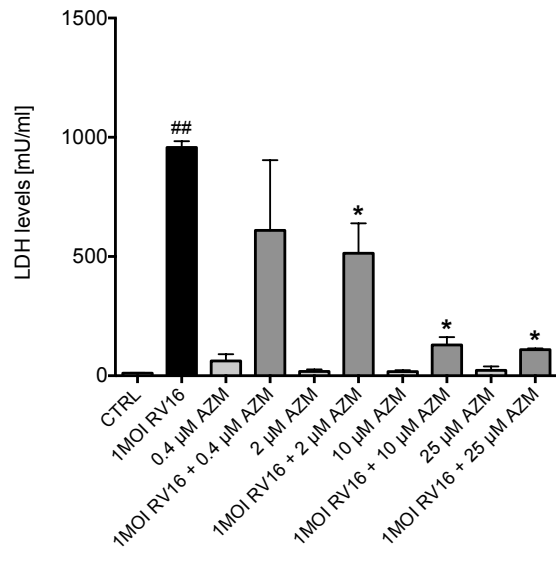

**Supplementary figure S2: Azithromycin (AZM) induces early expression of RIG-I like helicases independent of rhinoviral infection in bronchial epithelial cells from COPD patients.** HBECs from COPD patients were pre-treated with azithromycin for 24h before infections with 1MOI RV16 and continuous throughout the experiment. Cells were harvested for gene expression analysis 8h post infection (a, b). HBECs from COPD patients were pre-treated with azithromycin for 24h and continuous throughout the experiment. Cells were harvested for gene expression analysis at 8h (c, d). Gene expression levels of RIG-I (a, c) and MDA5 (b, d) were measured by real-time PCR and data is presented as mean  $\pm$  standard error of the mean (SEM) fold change of control relative to UBC/GAPDH expression. Comparison of different groups was performed by Kruskal-Wallis with Wilcoxon post testing or Dunn's post testing. #:  $p < 0.05$  RV16 vs. control; \*:  $p < 0.05$ , \*\*:  $p < 0.01$  vs. RV16. Data was obtained from 5 donors. A representative Western Blot image of RIG-I (e) and MDA5 (f) protein is shown.

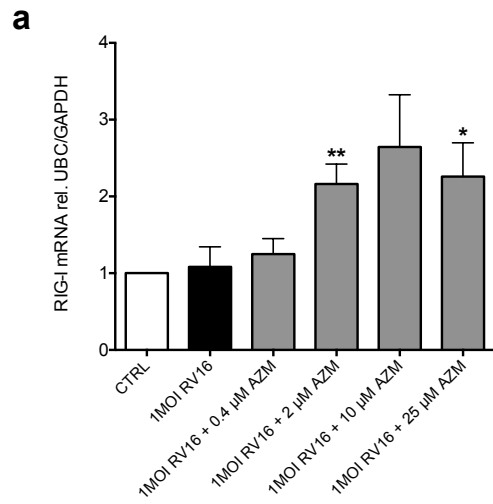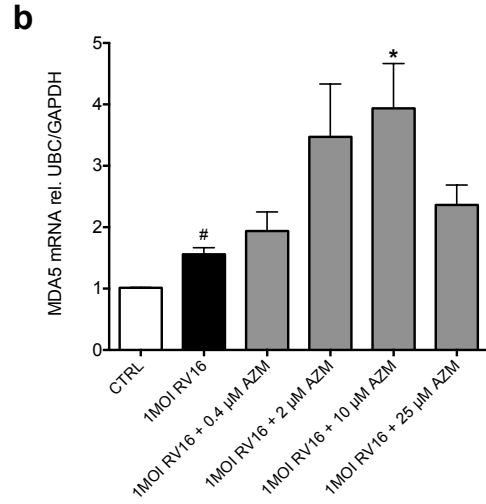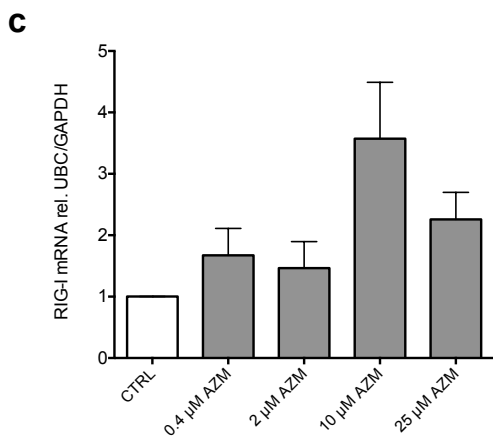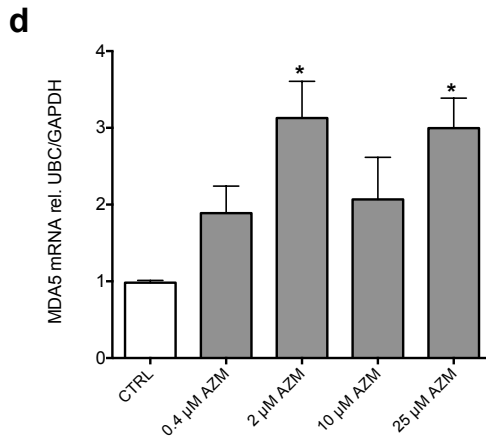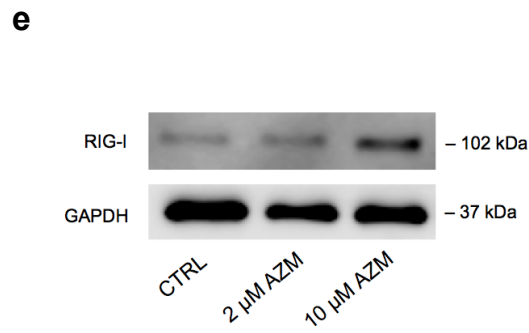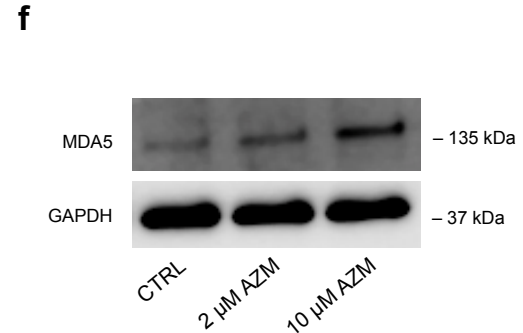

**Supplementary figure S3: Azithromycin (AZM) treatment alone has no interferon-inducing effect at 24h in bronchial epithelial cells from COPD patients.** HBECs from COPD patients were pre-treated with azithromycin for 24h and continuous throughout the experiment. Cells were harvested for gene expression analysis at 24h. Gene expression levels of IFN $\beta$  (a) and IFN $\lambda$ 1 (b) were measured by real-time PCR and data is presented as mean  $\pm$  standard error of the mean (SEM) fold change of control relative to UBC/GAPDH expression. Comparison of different groups was performed by Kruskal-Wallis with Dunn's post testing. Data was obtained from 3 donors.

**a**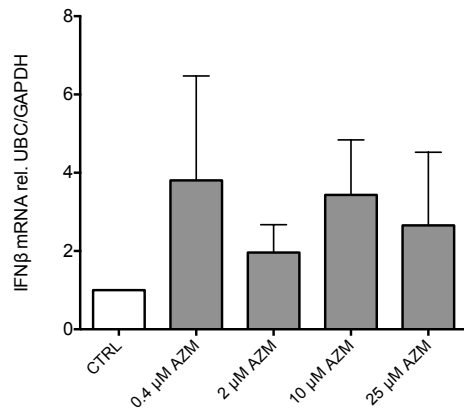**b**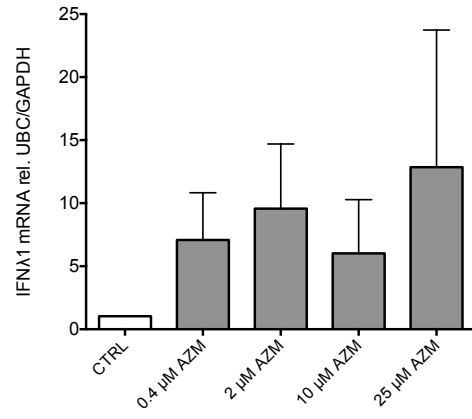

Supplement: srep28698-s1.pdf [file srep28698-s1.pdf]
